# Supplementary material
Source: PubMed Central journal article supplement (PMC153564)

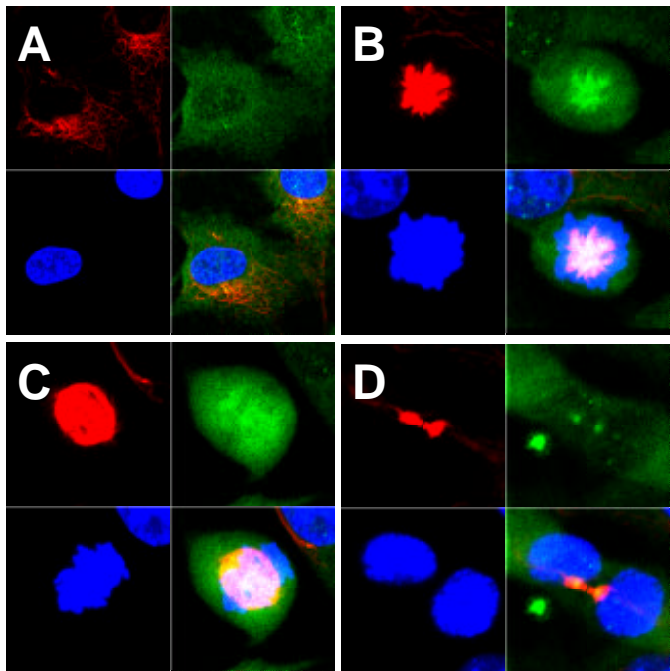

Supplement: pnas_0430973100_10.pdf [file pnas_0430973100_10.pdf]

**A**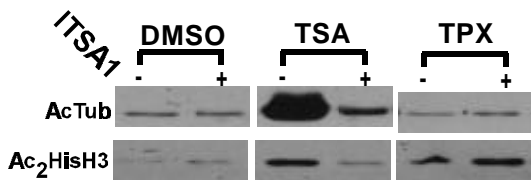**B**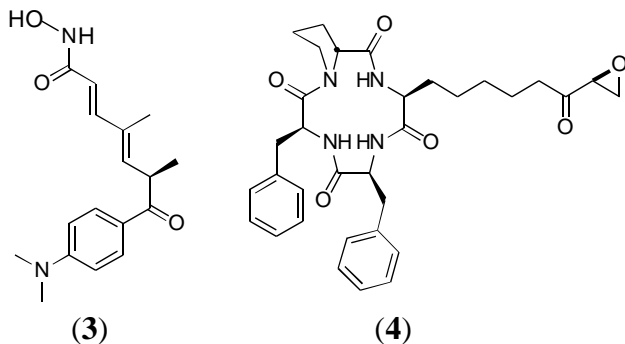**C**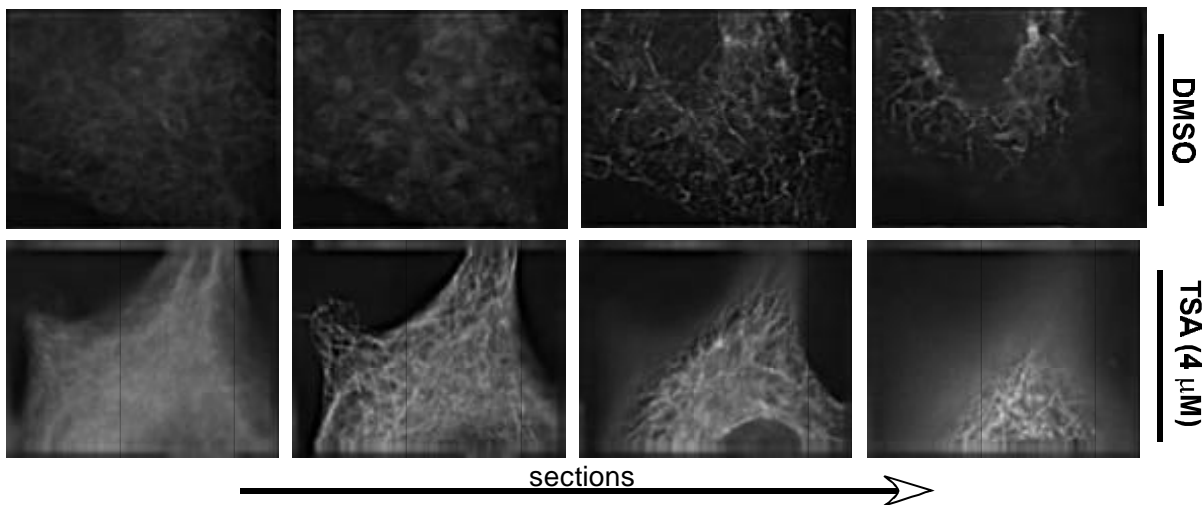**D**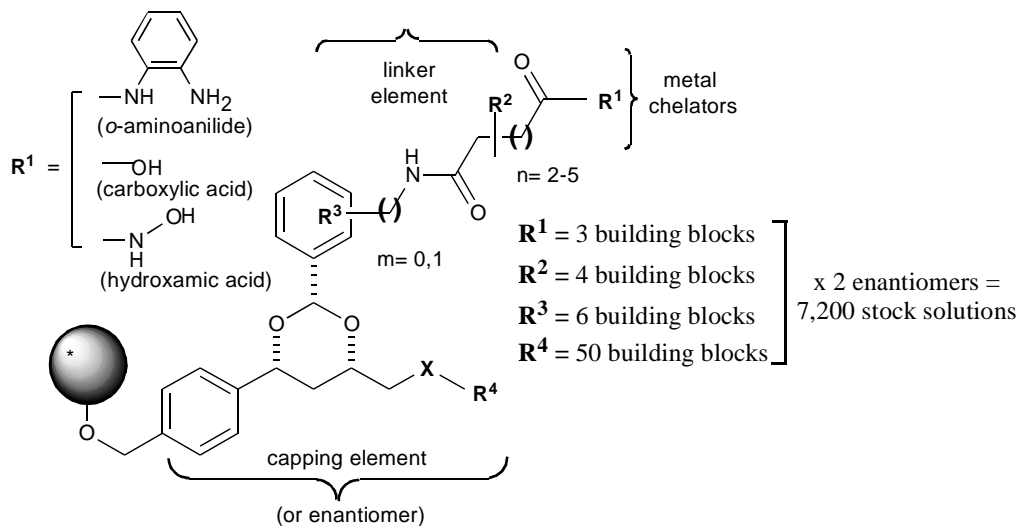

Supplement: pnas_0430973100_6.pdf [file pnas_0430973100_6.pdf]

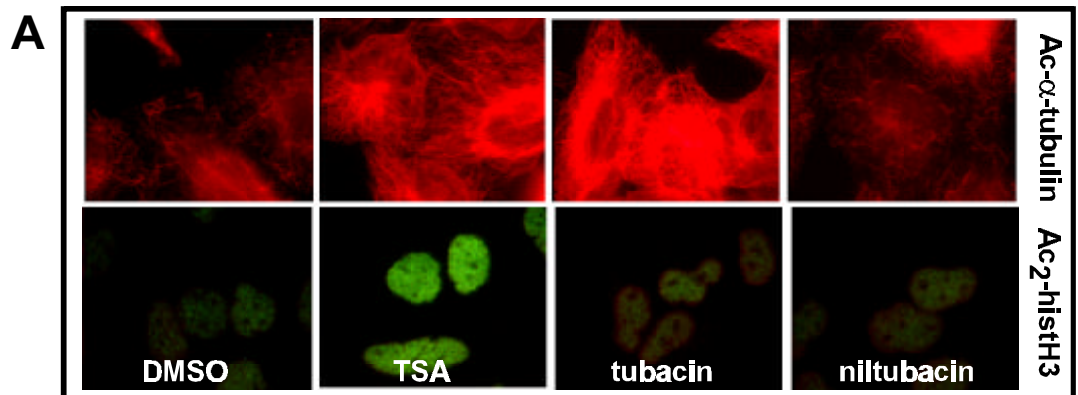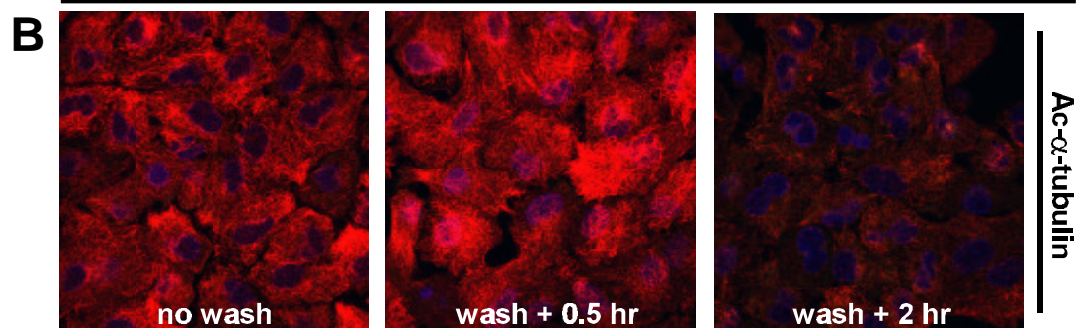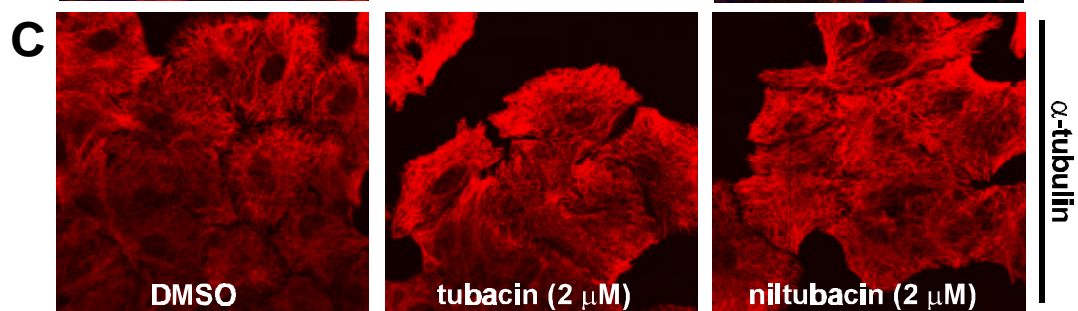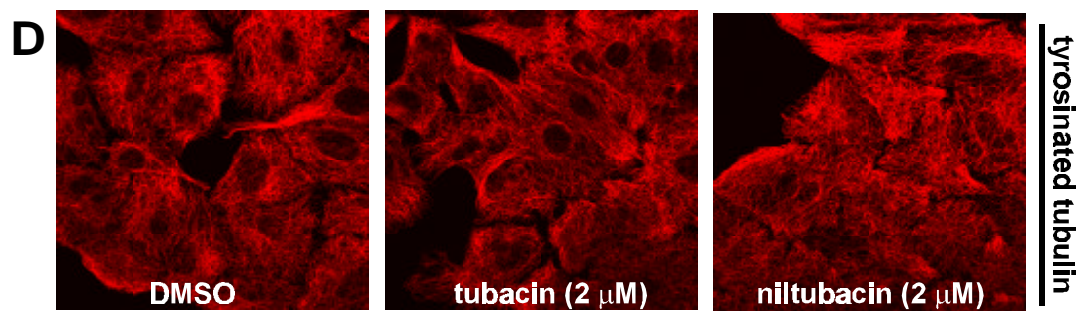

Supplement: pnas_0430973100_7.pdf [file pnas_0430973100_7.pdf]

**A**

| Treatment       | Mean $\alpha$ -tubulin acetylation |
|-----------------|------------------------------------|
| DMSO            | 92                                 |
| ITSA1           | 82                                 |
| TSA             | 322                                |
| TSA + ITSA1     | 104                                |
| tubacin         | 183                                |
| tubacin + ITSA1 | 110                                |

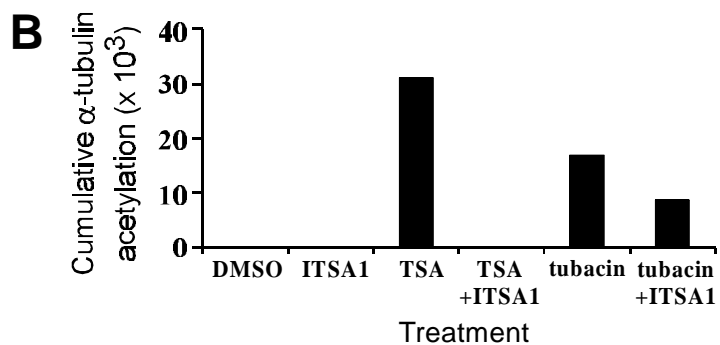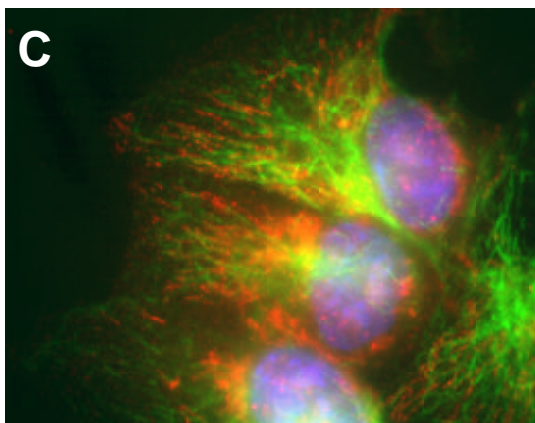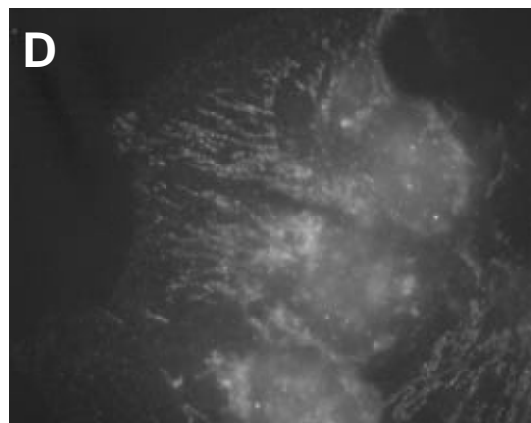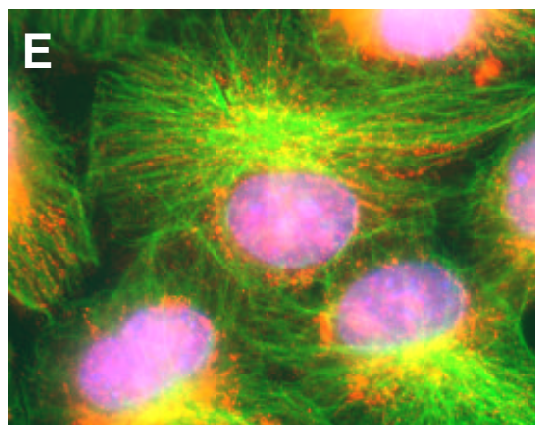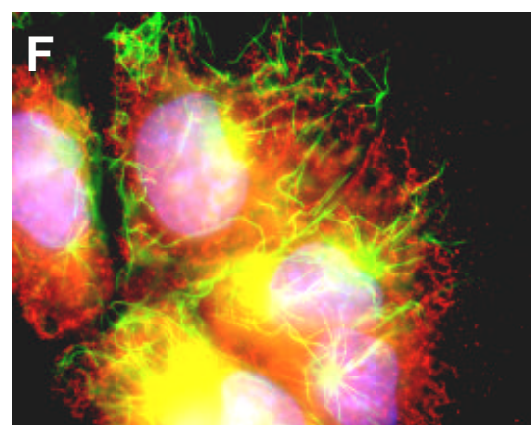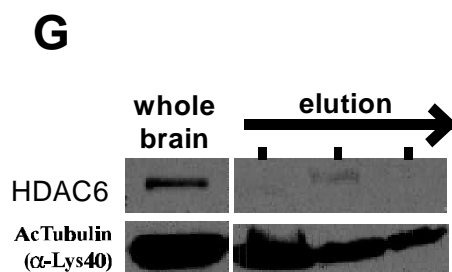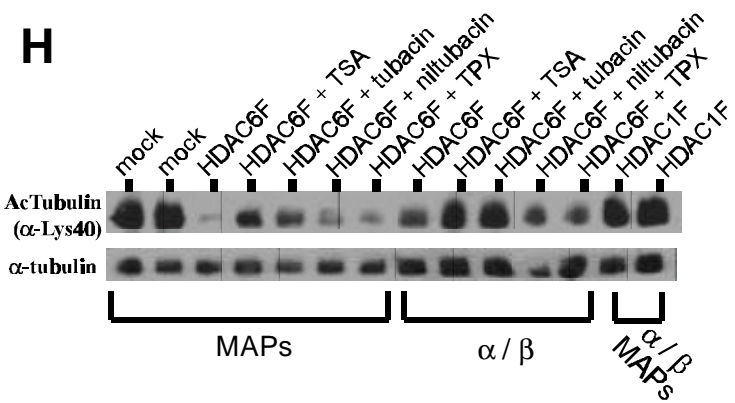

Supplement: pnas_0430973100_8.pdf [file pnas_0430973100_8.pdf]

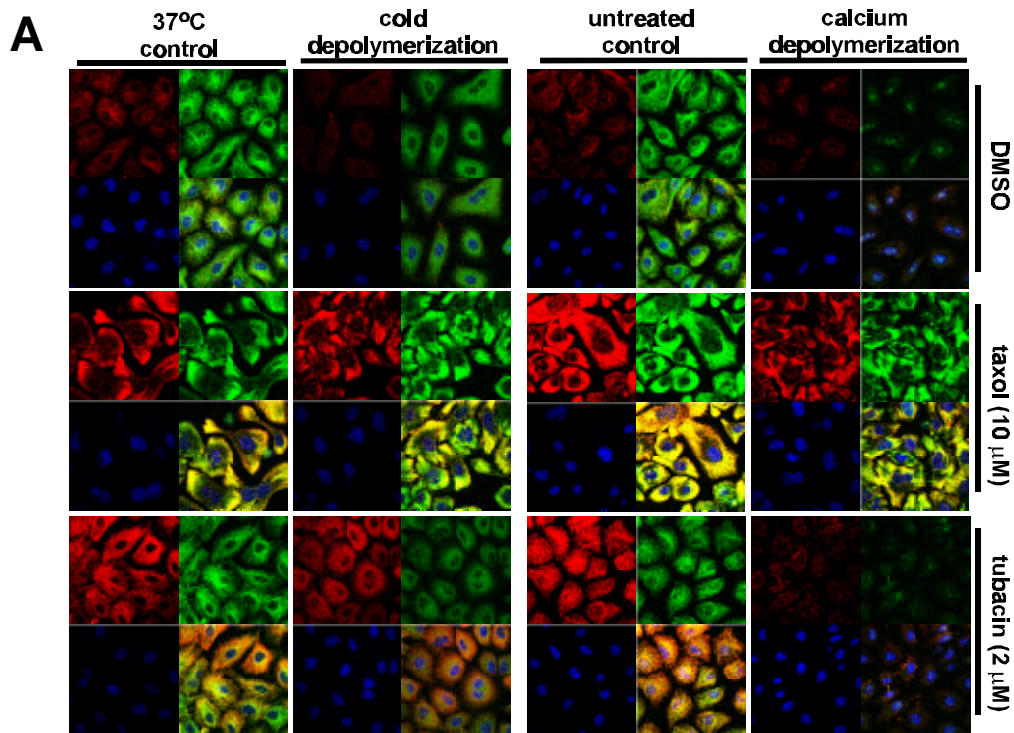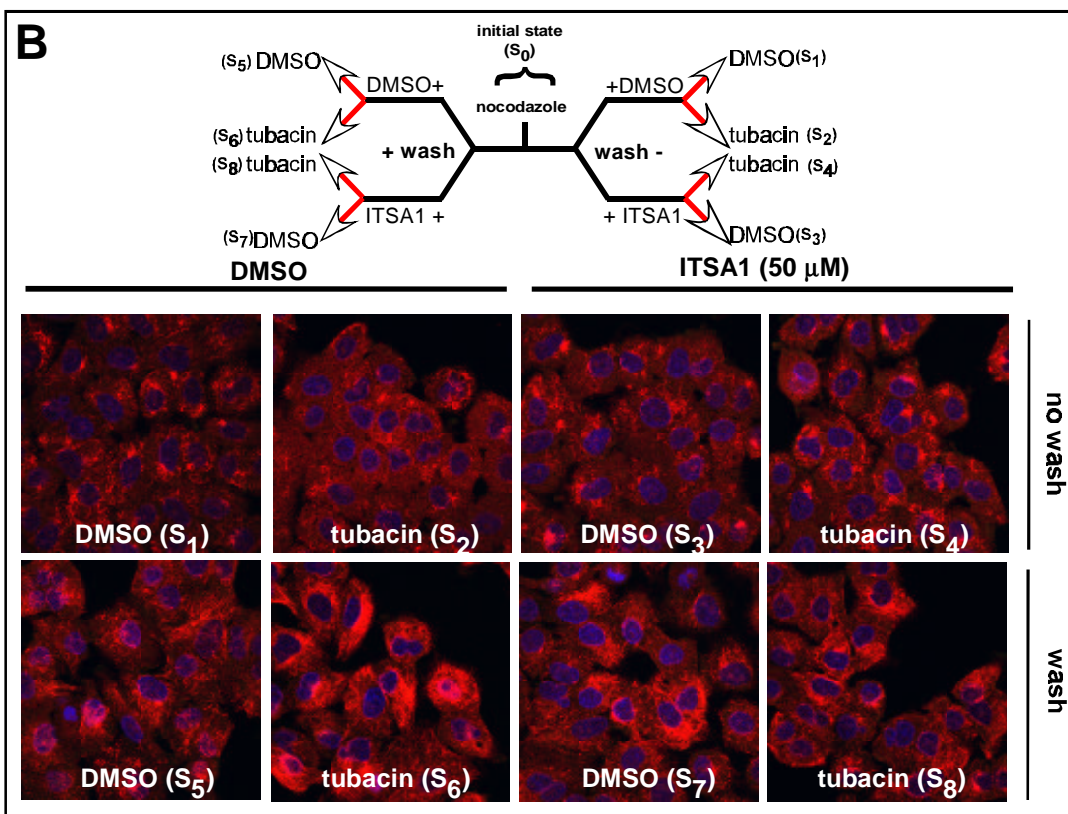

Supplement: pnas_0430973100_9.pdf [file pnas_0430973100_9.pdf]
